# Supplementary material for: Plant immune and growth receptors share common signalling components but localise to distinct plasma membrane nanodomains
Source: eLife. 2017 Mar 6;6:e25114. doi: 10.7554/eLife.25114 (PMC5383397; doi:10.7554/eLife.25114)
Supplement: Supplementary file 1. — In this table a summary of the quantitative image analysis is given providing the number of independent biological experiments, the number of technical replicates as well as the results of t-tests and the corresponding final p-values. The final p-values were obtained by multiplying the t-test results with a Bonferroni factor of 2. For the comparison of FLS2 and BRI1 two-tailed heteroscedastic t-tests were applied. For the comparison of original and rotated images two-tailed homoscedastic t-tests were applied. For time series experiments one-tailed heteroscedastic t-tests were applied. The results of t-tests and final p-values were based on the analysis of the corresponding mean values for respective independent biological experiments. The presented mean values are in the units shown in the respective figures. ‘SD’ stands for standard deviation based on the technical replicates. ‘At’ stands for Arabidopsis thaliana and ‘Nb’ stands for Nicotiana benthamiana. ‘FLS2/BSK1’, ‘BRI1/BSK1’, ‘FLS2/BIK1’, and ‘BRI1/BIK1’ represent the respective BiFC complexes. DOI: http://dx.doi.org/10.7554/eLife.25114.022 [file elife-25114-supp1.xlsx]

## Sheet: Sheet1
Table 1: Summary of quantitative image analysis.
Figure	Biological replicates	Mean ± SD			Technical replicates	t-test (mean values)		final p-value
Figure 1E	Exp1		FLS2 (At)	356 ± 49	23	FLS2 (At) - BRI1 (At)	0.844113	> 1
			BRI1 (At)	372 ± 37	15	FLS2 (Nb) - BRI1 (Nb)	0.512	> 1
			FLS2 (Nb)	420 ± 34	26	FLS2 (At) - FLS2 (Nb)	0.027	0.055
			BRI1 (Nb)	429 + 34	25	BRI1 (At) - BRI1 (Nb)	0.071	0.141
	Exp2		FLS2 (At)	363 ± 49	31
			BRI1 (At)	347 ± 63	15
			FLS2 (Nb)	423 ± 37	16
			BRI1 (Nb)	431 ± 29	17
	Exp3		FLS2 (At)	389 ± 39	22
			BRI1 (At)	401 ± 37	14
			FLS2 (Nb)	398 ± 37	19
			BRI1 (Nb)	406 ± 39	18
Figure 1F	Exp1		FLS2 (At)	2.21 ± 0.33	23	FLS2 (At) - BRI1 (At)	0.179	0.358
			BRI1 (At)	2.02 ± 0.27	15	FLS2 (Nb) - BRI1 (Nb)	0.602	> 1
			FLS2 (Nb)	2.54 ± 0.24	26	FLS2 (At) - FLS2 (Nb)	0.142	0.283
			BRI1 (Nb)	2.23 ± 0.34	25	BRI1 (At) - BRI1 (Nb)	0.159	0.318
	Exp2		FLS2 (At)	2.12 ± 0.26	31
			BRI1 (At)	2.18 ± 0.32	15
			FLS2 (Nb)	2.23 ± 0.26	16
			BRI1 (Nb)	2.43 ± 0.39	17
	Exp3		FLS2 (At)	2.24 ± 0.34	22
			BRI1 (At)	2.07 ± 0.22	14
			FLS2 (Nb)	2.41 ± 0.13	19
			BRI1 (Nb)	2.91 ± 0.27	18
Figure 2F	Exp1	0-0.1 µm	FLS2	0.73 ± 0.08	20	0-0.1 µm FLS2 - BRI1	0.2	0.4
			BRI1	0.73 ± 0.07	25	0.1-0.4 µm FLS2 - BRI1	0.176	0.352
		0.1-0.4 µm	FLS2	0.23 ± 0.05	20	> 0.4 µm FLS2 - BRI1	0.649	> 1
			BRI1	0.23 ± 0.06	25
		> 0.4 µm	FLS2	0.04 ± 0.02	20
			BRI1	0.04 ± 0.02	25
	Exp2	0-0.1 µm	FLS2	0.68 ± 0.12	24
			BRI1	0.66 ± 0.14	23
		0.1-0.4 µm	FLS2	0.27 ± 0.09	24
			BRI1	0.29 ± 0.12	23
		> 0.4 µm	FLS2	0.05 ± 0.03	24
			BRI1	0.05 ± 0.03	23
	Exp3	0-0.1 µm	FLS2	0.71 ± 0.09	25
			BRI1	0.67 ± 0.08	30
		0.1-0.4 µm	FLS2	0.24 ± 0.07	25
			BRI1	0.29 ± 0.07	30
		> 0.4 µm	FLS2	0.04 ± 0.02	25
			BRI1	0.04 ± 0.02	30
	Exp4	0-0.1 µm	FLS2	0.72 ± 0.07	20
			BRI1	0.60 ± 0.13	21
		0.1-0.4 µm	FLS2	0.24 ± 0.05	20
			BRI1	0.35 ± 0.10	21
		> 0.4 µm	FLS2	0.05 ± 0.02	20
			BRI1	0.06 ± 0.03	21
Figure 2G	Exp1	0-1 sec	FLS2	0.58 ± 0.04	20	0-1 sec FLS2 - BRI1	0.001	0.002
			BRI1	0.64 ± 0.07	25	1-4 sec FLS2 - BRI1	0.005	0.011
		1-4 sec	FLS2	0.39 ± 0.03	20	> 4 sec FLS2 - BRI1	3.51e-06	7.02e-06
			BRI1	0.34 ± 0.06	25
		> 4 sec	FLS2	0.03 ± 0.01	20
			BRI1	0.01 ± 0.01	25
	Exp2	0-1 sec	FLS2	0.59 ± 0.04	24
			BRI1	0.63 ± 0.06	23
		1-4 sec	FLS2	0.38 ± 0.03	24
			BRI1	0.36 ± 0.06	23
		> 4 sec	FLS2	0.03 ± 0.01	24
			BRI1	0.01 ± 0.01	23
	Exp3	0-1 sec	FLS2	0.57 ± 0.03	25
			BRI1	0.67 ± 0.06	30
		1-4 sec	FLS2	0.39 ± 0.03	25
			BRI1	0.33 ± 0.05	30
		> 4 sec	FLS2	0.03 ± 0.01	25
			BRI1	0.01 ± 0.01	30
	Exp4	0-1 sec	FLS2	0.57 ± 0.04	20
			BRI1	0.63 ± 0.06	21
		1-4 sec	FLS2	0.40 ± 0.03	20
			BRI1	0.36 ± 0.05	21
		> 4 sec	FLS2	0.04 ± 0.01	20
			BRI1	0.01 ± 0.01	21
Figure 3A	Exp1	0-0.1 µm	FLS2 BRZ	0.69 ± 0.08	20	0-0.1 µm FLS2 BRZ - FLS2 mock	0.483	0.966
			FLS2 mock	0.69 ± 0.10	19	0-0.1 µm BRI1 BRZ - BRI1 mock	0.023	0.046
			BRI1 BRZ	0.48 ± 0.09	21	0-0.1 µm FLS2 BRZ - BRI1 BRZ	0.005	0.01
			BRI1 mock	0.58 ± 0.08	19	0-0.1 µm FLS2 mock - BRI1 mock	0.035	0.07
		0.1-0.4 µm	FLS2 BRZ	0.26 ± 0.06	20	0.1-0.4 µm FLS2 BRZ - FLS2 mock	0.468	0.936
			FLS2 mock	0.26 ± 0.07	19	0.1-0.4 µm BRI1 BRZ - BRI1 mock	0.022	0.044
			BRI1 BRZ	0.44 ± 0.07	21	0.1-0.4 µm FLS2 BRZ - BRI1 BRZ	0.005	0.01
			BRI1 mock	0.36 ± 0.07	19	0.1-0.4 µm FLS2 mock - BRI1 mock	0.017	0.034
		> 0.4 µm	FLS2 BRZ	0.05 ± 0.02	20	> 0.4 µm FLS2 BRZ - FLS2 mock	0.339	0.678
			FLS2 mock	0.05 ± 0.03	19	> 0.4 µm BRI1 BRZ - BRI1 mock	0.025	0.05
			BRI1 BRZ	0.08 ± 0.03	21	> 0.4 µm FLS2 BRZ - BRI1 BRZ	0.01	0.02
			BRI1 mock	0.06 ± 0.02	19	> 0.4 µm FLS2 mock - BRI1 mock	0.428	0.856
	Exp2	0-0.1 µm	FLS2 BRZ	0.62 ± 0.13	18
			FLS2 mock	0.60 ± 0.10	20
			BRI1 BRZ	0.48 ± 0.08	19
			BRI1 mock	0.52 ± 0.10	19
		0.1-0.4 µm	FLS2 BRZ	0.31 ± 0.09	18
			FLS2 mock	0.33 ± 0.07	20
			BRI1 BRZ	0.44 ± 0.06	19
			BRI1 mock	0.40 ± 0.07	19
		> 0.4 µm	FLS2 BRZ	0.06 ± 0.05	18
			FLS2 mock	0.07 ± 0.03	20
			BRI1 BRZ	0.08 ± 0.02	19
			BRI1 mock	0.07 ± 0.03	19
	Exp3	0-0.1 µm	FLS2 BRZ	0.65 ± 0.09	17
			FLS2 mock	0.67 ± 0.06	17
			BRI1 BRZ	0.50 ± 0.09	17
			BRI1 mock	0.58 ± 0.07	17
		0.1-0.4 µm	FLS2 BRZ	0.30 ± 0.07	17
			FLS2 mock	0.28 ± 0.04	17
			BRI1 BRZ	0.42 ± 0.07	17
			BRI1 mock	0.36 ± 0.05	17
		> 0.4 µm	FLS2 BRZ	0.05 ± 0.02	17
			FLS2 mock	0.05 ± 0.02	17
			BRI1 BRZ	0.08 ± 0.03	17
			BRI1 mock	0.05 ± 0.02	17
Figure 3B	Exp1	0-1 sec	FLS2 BRZ	0.55 ± 0.04	20	0-1 sec FLS2 BRZ - FLS2 mock	0.235	0.47
			FLS2 mock	0.54 ± 0.05	19	0-1 sec BRI1 BRZ - BRI1 mock	0.134	0.268
			BRI1 BRZ	0.60 ± 0.06	21	0-1 sec FLS2 BRZ - BRI1 BRZ	0.179	0.358
			BRI1 mock	0.63 ± 0.06	19	0-1 sec FLS2 mock - BRI1 mock	0.002	0.004
		1-4 sec	FLS2 BRZ	0.41 ± 0.02	20	1-4 sec FLS2 BRZ - FLS2 mock	0.219	0.438
			FLS2 mock	0.42 ± 0.03	19	1-4 sec BRI1 BRZ - BRI1 mock	0.138	0.276
			BRI1 BRZ	0.38 ± 0.05	21	1-4 sec FLS2 BRZ - BRI1 BRZ	0.337	0.674
			BRI1 mock	0.35 ± 0.05	19	1-4 sec FLS2 mock - BRI1 mock	0.013	0.026
		> 4 sec	FLS2 BRZ	0.04 ± 0.01	20	> 4 sec FLS2 BRZ - FLS2 mock	0.418	0.836
			FLS2 mock	0.04 ± 0.02	19	> 4 sec BRI1 BRZ - BRI1 mock	0.13	0.26
			BRI1 BRZ	0.02 ± 0.01	21	> 4 sec FLS2 BRZ - BRI1 BRZ	0.016	0.032
			BRI1 mock	0.02 ± 0.01	19	> 4 sec FLS2 mock - BRI1 mock	0.002	0.004
	Exp2	0-1 sec	FLS2 BRZ	0.56 ± 0.05	18
			FLS2 mock	0.56 ± 0.05	20
			BRI1 BRZ	0.61 ± 0.06	19
			BRI1 mock	0.63 ± 0.08	19
		1-4 sec	FLS2 BRZ	0.40 ± 0.05	18
			FLS2 mock	0.41 ± 0.04	20
			BRI1 BRZ	0.37 ± 0.06	19
			BRI1 mock	0.35 ± 0.06	19
		> 4 sec	FLS2 BRZ	0.04 ± 0.04	18
			FLS2 mock	0.04 ± 0.01	20
			BRI1 BRZ	0.02 ± 0.01	19
			BRI1 mock	0.01 ± 0.02	19
	Exp3	0-1 sec	FLS2 BRZ	0.54 ± 0.04	17
			FLS2 mock	0.52 ± 0.04	17
			BRI1 BRZ	0.53 ± 0.06	17
			BRI1 mock	0.60 ± 0.06	17
		1-4 sec	FLS2 BRZ	0.42 ± 0.03	17
			FLS2 mock	0.43 ± 0.02	17
			BRI1 BRZ	0.044 ± 0.05	17
			BRI1 mock	0.39 ± 0.05	17
		> 4 sec	FLS2 BRZ	0.04 ± 0.02	17
			FLS2 mock	0.05 ± 0.01	17
			BRI1 BRZ	0.03 ± 0.02	17
			BRI1 mock	0.01 ± 0.01	17
Figure 3C	Exp1	0-10 min	FLS2 BL	0.60 ± 0.07	9	0-10 min FLS2 BL - FLS2 mock	0.386	0.772
			FLS2 mock	0.40 ± 0.06	2	0-10 min BRI1 BL - BRI1 mock	0.066	0.132
			BRI1 BL	0.45 ± 0.09	9	0-10 min FLS2 BL - BRI1 BL	0.002	0.004
			BRI1 mock	0.47 ± 0.00	2	0-10 min FLS2 mock - BRI1 mock	0.264	0.528
		10-20 min	FLS2 BL	0.68 ± 0.07	9	10-20 min FLS2 BL - FLS2 mock	0.175	0.35
			FLS2 mock	0.59 ± 0.05	2	10-20 min BRI1 BL - BRI1 mock	0.206	0.412
			BRI1 BL	0.56 ± 0.06	9	10-20 min FLS2 BL - BRI1 BL	0.001	0.002
			BRI1 mock	0.52 ± 0.10	3	10-20 min FLS2 mock - BRI1 mock	0.026	0.052
		20-30 min	FLS2 BL	0.65 ± 0.09	12	20-30 min FLS2 BL - FLS2 mock	0.226	0.452
			FLS2 mock	0.50 ± 0.06	2	20-30 min BRI1 BL - BRI1 mock	0.074	0.148
			BRI1 BL	0.53 ± 0.07	13	20-30 min FLS2 BL - BRI1 BL	0.068	0.136
			BRI1 mock	0.53 ± 0.07	2	20-30 min FLS2 mock - BRI1 mock	0.195	0.39
	Exp2	0-10 min	FLS2 BL	0.59 ± 0.18	9
			FLS2 mock	0.62 ± 0.06	2	0-10 min FLS2 BL - 10-20 min FLS2 BL	0.003	0.006
			BRI1 BL	0.47 ± 0.07	9	10-20 min FLS2 BL - 20-30 min FLS2 BL	0.18	0.36
			BRI1 mock	0.53 ± 0.08	3	0-10 min FLS2 BL - 20-30 min FLS2 BL	0.006	0.012
		10-20 min	FLS2 BL	0.69 ± 0.08	9	0-10 min BRI1 BL - 10-20 min BRI1 BL	0.014	0.028
			FLS2 mock	0.65 ± 0.05	3	10-20 min BRI1 BL - 20-30 min BRI1 BL	0.105	0.21
			BRI1 BL	0.52 ± 0.08	9	0-10 min BRI1 BL - 20-30 min BRI1 BL	0.027	0.054
			BRI1 mock	0.51 ± 0.02	3
		20-30 min	FLS2 BL	0.65 ± 0.06	12	0-10 min FLS2 mock - 10-20 min FLS2 mock	0.201	0.402
			FLS2 mock	0.56 ± 0.11	3	10-20 min FLS2 mock - 20-30 min FLS2 mock	0.497	0.994
			BRI1 BL	0.62 ± 0.11	13	0-10 min FLS2 mock - 20-30 min FLS2 mock	0.243	0.486
			BRI1 mock	0.55 ± 0.05	3	0-10 min BRI1 mock - 10-20 min BRI1 mock	0.161	0.322
	Exp3	0-10 min	FLS2 BL	0.56 ± 0.15	9	10-20 min BRI1 mock - 20-30 min BRI1 mock	0.497	0.994
			FLS2 mock	0.66 ± 0.02	3	0-10 min BRI1 mock - 20-30 min BRI1 mock	0.242	0.484
			BRI1 BL	0.46 ± 0.06	9
			BRI1 mock	0.49 ± 0.05	3
		10-20 min	FLS2 BL	0.66 ± 0.10	9
			FLS2 mock	0.69 ± 0.04	3
			BRI1 BL	0.52 ± 0.12	9
			BRI1 mock	0.52 ± 0.03	3
		20-30 min	FLS2 BL	0.69 ± 0.07	12
			FLS2 mock	0.72 ± 0.04	3
			BRI1 BL	0.62 ± 0.09	12
			BRI1 mock	0.48 ± 0.07	4
Figure 3D	Exp1	0-10 min	FLS2 BL	0.56 ± 0.05	9	0-10 min FLS2 BL - FLS2 mock	0.360679	0.721358
			FLS2 mock	0.41 ± 0.05	2	0-10 min BRI1 BL - BRI1 mock	0.12446	0.248919
			BRI1 BL	0.64 ± 0.08	9	0-10 min FLS2 BL - BRI1 BL	0.0996548	0.19931
			BRI1 mock	0.63 ± 0.00	2	0-10 min FLS2 mock - BRI1 mock	0.0695565	0.139113
		10-20 min	FLS2 BL	0.54 ± 0.05	9	10-20 min FLS2 BL - FLS2 mock	0.444066	0.888132
			FLS2 mock	0.56 ± 0.03	2	10-20 min BRI1 BL - BRI1 mock	0.498885	0.997771
			BRI1 BL	0.64 ± 0.05	9	10-20 min FLS2 BL - BRI1 BL	0.194653	0.389306
			BRI1 mock	0.59 ± 0.04	3	10-20 min FLS2 mock - BRI1 mock	0.0123269	0.0246539
		20-30 min	FLS2 BL	0.54 ± 0.06	12	20-30 min FLS2 BL - FLS2 mock	0.164874	0.329749
			FLS2 mock	0.45 ± 0.02	2	20-30 min BRI1 BL - BRI1 mock	0.195161	0.390322
			BRI1 BL	0.63 ± 0.07	13	20-30 min FLS2 BL - BRI1 BL	0.0311512	0.0623025
			BRI1 mock	0.60 ± 0.03	2	20-30 min FLS2 mock - BRI1 mock	0.0555194	0.111039
	Exp2	0-10 min	FLS2 BL	0.54 ± 0.11	9
			FLS2 mock	0.60 ± 0.01	2	0-10 min FLS2 BL - 10-20 min FLS2 BL	0.242394	0.484787
			BRI1 BL	0.55 ± 0.06	9	10-20 min FLS2 BL - 20-30 min FLS2 BL	0.265348	0.530697
			BRI1 mock	0.66 ± 0.07	3	0-10 min FLS2 BL - 20-30 min FLS2 BL	0.367878	0.735756
		10-20 min	FLS2 BL	0.58 ± 0.05	9	0-10 min BRI1 BL - 10-20 min BRI1 BL	0.482264	0.964529
			FLS2 mock	0.55 ± 0.02	3	10-20 min BRI1 BL - 20-30 min BRI1 BL	0.328072	0.656144
			BRI1 BL	0.57 ± 0.05	9	0-10 min BRI1 BL - 20-30 min BRI1 BL	0.343294	0.686589
			BRI1 mock	0.60 ± 0.04	3
		20-30 min	FLS2 BL	0.54 ± 0.03	12	0-10 min FLS2 mock - 10-20 min FLS2 mock	0.244924	0.489847
			FLS2 mock	0.50 ± 0.06	3	10-20 min FLS2 mock - 20-30 min FLS2 mock	0.110435	0.220869
			BRI1 BL	0.61 ± 0.06	13	0-10 min FLS2 mock - 20-30 min FLS2 mock	0.448946	0.897893
			BRI1 mock	0.59 ± 0.03	3	0-10 min BRI1 mock - 10-20 min BRI1 mock	0.0188871	0.0377742
	Exp3	0-10 min	FLS2 BL	0.49 ± 0.04	9	10-20 min BRI1 mock - 20-30 min BRI1 mock	0.367863	0.735725
			FLS2 mock	0.52 ± 0.01	3	0-10 min BRI1 mock - 20-30 min BRI1 mock	0.0399984	0.0799968
			BRI1 BL	0.57 ± 0.05	9
			BRI1 mock	0.61 ± 0.04	3
		10-20 min	FLS2 BL	0.53 ± 0.04	9
			FLS2 mock	0.55 ± 0.04	3
			BRI1 BL	0.55 ± 0.07	9
			BRI1 mock	0.057 ± 0.02	3
		20-30 min	FLS2 BL	0.54 ± 0.04	12
			FLS2 mock	0.55 ± 0.02	3
			BRI1 BL	0.57 ± 0.03	12
			BRI1 mock	0.54 ± 0.05	4
Figure 3E	Exp1	0-10 min	FLS2 BL	0.34 ± 0.05	9	0-10 min FLS2 BL - FLS2 mock	0.34944	0.698881
			FLS2 mock	0.46 ± 0.03	2	0-10 min BRI1 BL - BRI1 mock	0.0749766	0.149953
			BRI1 BL	0.47 ± 0.06	9	0-10 min FLS2 BL - BRI1 BL	0.000434146	0.000868291
			BRI1 mock	0.45 ± 0.01	2	0-10 min FLS2 mock - BRI1 mock	0.153898	0.307795
		10-20 min	FLS2 BL	0.28 ± 0.05	9	10-20 min FLS2 BL - FLS2 mock	0.125047	0.250095
			FLS2 mock	0.34 ± 0.03	2	10-20 min BRI1 BL - BRI1 mock	0.0957706	0.191541
			BRI1 BL	0.38 ± 0.05	9	10-20 min FLS2 BL - BRI1 BL	0.000154948	0.000309897
			BRI1 mock	0.40 ± 0.08	3	10-20 min FLS2 mock - BRI1 mock	0.00754083	0.0150817
		20-30 min	FLS2 BL	0.30 ± 0.06	12	20-30 min FLS2 BL - FLS2 mock	0.234592	0.469184
			FLS2 mock	0.39 ± 0.04	2	20-30 min BRI1 BL - BRI1 mock	0.123262	0.246524
			BRI1 BL	0.41 ± 0.06	13	20-30 min FLS2 BL - BRI1 BL	0.056659	0.113318
			BRI1 mock	0.38 ± 0.04	2	20-30 min FLS2 mock - BRI1 mock	0.134663	0.269326
	Exp2	0-10 min	FLS2 BL	0.33 ± 0.11	9
			FLS2 mock	0.34 ± 0.05	2	0-10 min FLS2 BL - 10-20 min FLS2 BL	0.00172786	0.00345571
			BRI1 BL	0.46 ± 0.05	9	10-20 min FLS2 BL - 20-30 min FLS2 BL	0.187163	0.374325
			BRI1 mock	0.41 ± 0.06	3	0-10 min FLS2 BL - 20-30 min FLS2 BL	0.0034535	0.006907
		10-20 min	FLS2 BL	0.26 ± 0.05	9	0-10 min BRI1 BL - 10-20 min BRI1 BL	0.00175672	0.00351344
			FLS2 mock	0.31 ± 0.04	3	10-20 min BRI1 BL - 20-30 min BRI1 BL	0.138428	0.276857
			BRI1 BL	0.41 ± 0.05	9	0-10 min BRI1 BL - 20-30 min BRI1 BL	0.0295472	0.0590944
			BRI1 mock	0.43 ± 0.01	3
		20-30 min	FLS2 BL	0.28 ± 0.05	12	0-10 min FLS2 mock - 10-20 min FLS2 mock	0.188851	0.377702
			FLS2 mock	0.36 ± 0.07	3	10-20 min FLS2 mock - 20-30 min FLS2 mock	0.357316	0.714633
			BRI1 BL	0.32 ± 0.08	13	0-10 min FLS2 mock - 20-30 min FLS2 mock	0.317391	0.634783
			BRI1 mock	0.39 ± 0.04	3	0-10 min BRI1 mock - 10-20 min BRI1 mock	0.21204	0.424081
	Exp3	0-10 min	FLS2 BL	0.35 ± 0.11	9	10-20 min BRI1 mock - 20-30 min BRI1 mock	0.247354	0.494708
			FLS2 mock	0.29 ± 0.02	3	0-10 min BRI1 mock - 20-30 min BRI1 mock	0.117802	0.235604
			BRI1 BL	0.47 ±0.04	9
			BRI1 mock	0.45 ± 0.04	3
		10-20 min	FLS2 BL	0.28 ± 0.07	9
			FLS2 mock	0.27 ± 0.03	3
			BRI1 BL	0.40 ± 0.08	9
			BRI1 mock	0.43 ± 0.01	3
		20-30 min	FLS2 BL	0.27 ± 0.06	12
			FLS2 mock	0.23 ± 0.03	4
			BRI1 BL	0.33 ± 0.08	12
			BRI1 mock	0.44 ± 0.05	4
Figure 3F	Exp1	0-10 min	FLS2 BL	0.40 ± 0.04	9	0-10 min FLS2 BL - FLS2 mock	0.395932	0.791864
			FLS2 mock	0.49 ± 0.01	2	0-10 min BRI1 BL - BRI1 mock	0.122215	0.24443
			BRI1 BL	0.35 ± 0.07	9	0-10 min FLS2 BL - BRI1 BL	0.230957	0.461915
			BRI1 mock	0.36 ± 0.01	2	0-10 min FLS2 mock - BRI1 mock	0.0599199	0.11984
		10-20 min	FLS2 BL	0.41 ± 0.03	9	10-20 min FLS2 BL - FLS2 mock	0.35985	0.719701
			FLS2 mock	0.40 ± 0.02	2	10-20 min BRI1 BL - BRI1 mock	0.489258	0.978516
			BRI1 BL	0.35 ± 0.04	9	10-20 min FLS2 BL - BRI1 BL	0.391187	0.782374
			BRI1 mock	0.40 ± 0.04	3	10-20 min FLS2 mock - BRI1 mock	0.0877089	0.175418
		20-30 min	FLS2 BL	0.41 ± 0.04	12	20-30 min FLS2 BL - FLS2 mock	0.176054	0.352108
			FLS2 mock	0.48 ± 0.01	2	20-30 min BRI1 BL - BRI1 mock	0.309087	0.618175
			BRI1 BL	0.35 ± 0.06	13	20-30 min FLS2 BL - BRI1 BL	0.0737614	0.147523
			BRI1 mock	0.37 ± 0.01	2	20-30 min FLS2 mock - BRI1 mock	0.0780182	0.156036
	Exp2	0-10 min	FLS2 BL	0.41 ± 0.06	9
			FLS2 mock	0.38 ± 0.00	2	0-10 min FLS2 BL - 10-20 min FLS2 BL	0.267077	0.534154
			BRI1 BL	0.43 ± 0.04	9	10-20 min FLS2 BL - 20-30 min FLS2 BL	0.256641	0.513282
			BRI1 mock	0.33 ± 0.06	3	0-10 min FLS2 BL - 20-30 min FLS2 BL	0.407433	0.814867
		10-20 min	FLS2 BL	0.39 ± 0.04	9	0-10 min BRI1 BL - 10-20 min BRI1 BL	0.474391	0.948782
			FLS2 mock	0.42 ± 0.02	3	10-20 min BRI1 BL - 20-30 min BRI1 BL	0.317716	0.635432
			BRI1 BL	0.41 ± 0.04	9	0-10 min BRI1 BL - 20-30 min BRI1 BL	0.338905	0.677809
			BRI1 mock	0.39 ± 0.03	3
		20-30 min	FLS2 BL	0.42 ± 0.02	12	0-10 min FLS2 mock - 10-20 min FLS2 mock	0.306951	0.613902
			FLS2 mock	0.45 ± 0.03	3	10-20 min FLS2 mock - 20-30 min FLS2 mock	0.145969	0.291939
			BRI1 BL	0.38 ± 0.05	13	0-10 min FLS2 mock - 20-30 min FLS2 mock	0.401546	0.803092
			BRI1 mock	0.39 ± 0.02	3	0-10 min BRI1 mock - 10-20 min BRI1 mock	0.0283134	0.0566269
	Exp3	0-10 min	FLS2 BL	0.45 ±0.03	9	10-20 min BRI1 mock - 20-30 min BRI1 mock	0.407917	0.815834
			FLS2 mock	0.43 ± 0.01	3	0-10 min BRI1 mock - 20-30 min BRI1 mock	0.0686464	0.137293
			BRI1 BL	0.41 ± 0.04	9
			BRI1 mock	0.38 ± 0.04	3
		10-20 min	FLS2 BL	0.43 ± 0.02	9
			FLS2 mock	0.42 ± 0.03	3
			BRI1 BL	0.44 ± 0.05	9
			BRI1 mock	0.41 ± 0.02	3
		20-30 min	FLS2 BL	0.42 ± 0.03	12
			FLS2 mock	0.40 ± 0.01	4
			BRI1 BL	0.41 ± 0.02	12
			BRI1 mock	0.43 ± 0.03	4
Figure 3G	Exp1	0-10 min	FLS2 BL	0.06 ± 0.02	9	0-10 min FLS2 BL - FLS2 mock	0.458237	0.916474
			FLS2 mock	0.14 ± 0.03	2	0-10 min BRI1 BL - BRI1 mock	0.157348	0.314697
			BRI1 BL	0.08 ± 0.04	9	0-10 min FLS2 BL - BRI1 BL	0.360148	0.720295
			BRI1 mock	0.08 ± 0.01	2	0-10 min FLS2 mock - BRI1 mock	0.405177	0.810354
		10-20 min	FLS2 BL	0.04 ± 0.02	9	10-20 min FLS2 BL - FLS2 mock	0.363839	0.727678
			FLS2 mock	0.08 ± 0.02	2	10-20 min BRI1 BL - BRI1 mock	0.286645	0.573289
			BRI1 BL	0.06 ± 0.01	9	10-20 min FLS2 BL - BRI1 BL	0.032463	0.0649261
			BRI1 mock	0.08 ± 0.02	3	10-20 min FLS2 mock - BRI1 mock	0.248544	0.497088
		20-30 min	FLS2 BL	0.06 ± 0.03	12	20-30 min FLS2 BL - FLS2 mock	0.209097	0.418193
			FLS2 mock	0.11 ± 0.02	2	20-30 min BRI1 BL - BRI1 mock	0.0234603	0.0469207
			BRI1 BL	0.06 ± 0.02	13	20-30 min FLS2 BL - BRI1 BL	0.451379	0.902757
			BRI1 mock	0.09 ± 0.03	2	20-30 min FLS2 mock - BRI1 mock	0.445736	0.891472
	Exp2	0-10 min	FLS2 BL	0.08 ± 0.07	9
			FLS2 mock	0.04 ± 0.00	2	0-10 min FLS2 BL - 10-20 min FLS2 BL	0.0315521	0.0631043
			BRI1 BL	0.08 ± 0.02	9	10-20 min FLS2 BL - 20-30 min FLS2 BL	0.216643	0.433285
			BRI1 mock	0.06 ± 0.02	3	0-10 min FLS2 BL - 20-30 min FLS2 BL	0.0563233	0.112647
		10-20 min	FLS2 BL	0.05 ± 0.02	9	0-10 min BRI1 BL - 10-20 min BRI1 BL	0.24841	0.49682
			FLS2 mock	0.04 ± 0.02	3	10-20 min BRI1 BL - 20-30 min BRI1 BL	0.0719893	0.143979
			BRI1 BL	0.08 ± 0.03	9	0-10 min BRI1 BL - 20-30 min BRI1 BL	0.0131185	0.026237
			BRI1 mock	0.06 ± 0.02	3
		20-30 min	FLS2 BL	0.06 ± 0.02	12	0-10 min FLS2 mock - 10-20 min FLS2 mock	0.261167	0.522334
			FLS2 mock	0.08 ± 0.03	3	10-20 min FLS2 mock - 20-30 min FLS2 mock	0.207474	0.414948
			BRI1 BL	0.06 ± 0.03	13	0-10 min FLS2 mock - 20-30 min FLS2 mock	0.493463	0.986926
			BRI1 mock	0.07 ± 0.01	3	0-10 min BRI1 mock - 10-20 min BRI1 mock	0.337982	0.675963
	Exp3	0-10 min	FLS2 BL	0.08 ± 0.04	9	10-20 min BRI1 mock - 20-30 min BRI1 mock	0.11503	0.230059
			FLS2 mock	0.05 ± 0.00	3	0-10 min BRI1 mock - 20-30 min BRI1 mock	0.141651	0.283302
			BRI1 BL	0.07 ± 0.02	9
			BRI1 mock	0.06 ± 0.02	3
		10-20 min	FLS2 BL	0.05 ± 0.03	9
			FLS2 mock	0.04 ± 0.01	3
			BRI1 BL	0.08 ± 0.05	9
			BRI1 mock	0.05 ± 0.02	3
		20-30 min	FLS2 BL	0.04 ± 0.02	12
			FLS2 mock	0.04 ± 0.01	4
			BRI1 BL	0.05 ± 0.01	12
			BRI1 mock	0.08 ± 0.03	4
Figure 3H	Exp1	0-10 min	FLS2 BL	0.04 ± 0.02	9	0-10 min FLS2 BL - FLS2 mock	0.314551	0.629102
			FLS2 mock	0.10 ± 0.03	2	0-10 min BRI1 BL - BRI1 mock	0.181403	0.362806
			BRI1 BL	0.01 ± 0.01	9	0-10 min FLS2 BL - BRI1 BL	0.00479315	0.0095863
			BRI1 mock	0.01 ± 0.01	2	0-10 min FLS2 mock - BRI1 mock	0.0816164	0.163233
		10-20 min	FLS2 BL	0.05 ± 0.03	9	10-20 min FLS2 BL - FLS2 mock	0.13828	0.276559
			FLS2 mock	0.04 ± 0.00	2	10-20 min BRI1 BL - BRI1 mock	0.394214	0.788428
			BRI1 BL	0.01 ± 0.00	9	10-20 min FLS2 BL - BRI1 BL	0.0111847	0.0223695
			BRI1 mock	0.01 ± 0.01	3	10-20 min FLS2 mock - BRI1 mock	0.00559405	0.0111881
		20-30 min	FLS2 BL	0.04 ± 0.03	12	20-30 min FLS2 BL - FLS2 mock	0.145314	0.290627
			FLS2 mock	0.07 ± 0.01	2	20-30 min BRI1 BL - BRI1 mock	0.00799772	0.0159954
			BRI1 BL	0.01 ± 0.01	13	20-30 min FLS2 BL - BRI1 BL	0.000505498	0.001011
			BRI1 mock	0.03 ± 0.02	2	20-30 min FLS2 mock - BRI1 mock	0.0434214	0.0868428
	Exp2	0-10 min	FLS2 BL	0.05 ± 0.05	9
			FLS2 mock	0.02 ± 0.01	2	0-10 min FLS2 BL - 10-20 min FLS2 BL	0.229337	0.458674
			BRI1 BL	0.02 ± 0.02	9	10-20 min FLS2 BL - 20-30 min FLS2 BL	0.33974	0.67948
			BRI1 mock	0.01 ± 0.01	3	0-10 min FLS2 BL - 20-30 min FLS2 BL	0.28235	0.564701
		10-20 min	FLS2 BL	0.03 ± 0.01	9	0-10 min BRI1 BL - 10-20 min BRI1 BL	0.454986	0.909971
			FLS2 mock	0.03 ± 0.00	3	10-20 min BRI1 BL - 20-30 min BRI1 BL	0.433662	0.867324
			BRI1 BL	0.02 ± 0.01	9	0-10 min BRI1 BL - 20-30 min BRI1 BL	0.393528	0.787055
			BRI1 mock	0.02 ± 0.01	3
		20-30 min	FLS2 BL	0.04 ± 0.01	12	0-10 min FLS2 mock - 10-20 min FLS2 mock	0.0821344	0.164269
			FLS2 mock	0.06 ± 0.02	3	10-20 min FLS2 mock - 20-30 min FLS2 mock	0.0152463	0.0304927
			BRI1 BL	0.01 ± 0.01	13	0-10 min FLS2 mock - 20-30 min FLS2 mock	0.00425442	0.00850884
			BRI1 mock	0.01 ± 0.01	3	0-10 min BRI1 mock - 10-20 min BRI1 mock	0.177709	0.355417
	Exp3	0-10 min	FLS2 BL	0.05 ± 0.02	9	10-20 min BRI1 mock - 20-30 min BRI1 mock	0.0646545	0.129309
			FLS2 mock	0.06 ± 0.00	3	0-10 min BRI1 mock - 20-30 min BRI1 mock	0.475392	0.950783
			BRI1 BL	0.01 ± 0.01	9
			BRI1 mock	0.01 ± 0.01	3
		10-20 min	FLS2 BL	0.04 ± 0.02	9
			FLS2 mock	0.03 ± 0.01	3
			BRI1 BL	0.02 ± 0.01	9
			BRI1 mock	0.02 ± 0.00	3
		20-30 min	FLS2 BL	0.04 ± 0.01	12
			FLS2 mock	0.04 ± 0.01	4
			BRI1 BL	0.02 ± 0.01	12
			BRI1 mock	0.03 ± 0.02	4
Figure 4A	Exp1	0-10 min	FLS2 flg22	0.53 ± 0.18	7	0-10 min FLS2 flg22 - FLS2 mock	0.362	0.724
			FLS2 mock	0.47 ± 0.04	3	0-10 min BRI1 flg22 - BRI1 mock	0.325	0.65
			BRI1 flg22	0.57 ± 0.12	6	0-10 min FLS2 flg22 - BRI1 flg22	0.104223	0.208446
			BRI1 mock	0.56 ± 0.26	3	0-10 min FLS2 mock - BRI1 mock	0.23562	0.47124
		10-20 min	FLS2 flg22	0.60 ± 0.14	9	10-20 min FLS2 flg22 - FLS2 mock	0.238	0.476
			FLS2 mock	0.43 ± 0.17	3	10-20 min BRI1 flg22 - BRI1 mock	0.312	0.624
			BRI1 flg22	0.53 ± 0.11	6	10-20 min FLS2 flg22 - BRI1 flg22	0.00988742	0.0197748
			BRI1 mock	0.51 ± 0.12	4	10-20 min FLS2 mock - BRI1 mock	0.195783	0.391567
		20-30 min	FLS2 flg22	0.74 ± 0.15	10	20-30 min FLS2 flg22 - FLS2 mock	0.014	0.028
			FLS2 mock	0.62 ± 0.11	5	20-30 min BRI1 flg22 - BRI1 mock	0.147	0.294
			BRI1 flg22	0.60 ± 0.13	8	20-30 min FLS2 flg22 - BRI1 flg22	0.00187576	0.00375153
			BRI1 mock	0.48 ± 0.07	5	20-30 min FLS2 mock - BRI1 mock	0.0226324	0.0452647
	Exp2	0-10 min	FLS2 flg22	0.55 ± 0.10	9
			FLS2 mock	0.65 ± 0.12	4	0-10 min FLS2 flg22 - 10-20 min FLS2 flg22	0.15145	0.3029
			BRI1 flg22	0.47 ± 0.10	9	10-20 min FLS2 flg22 - 20-30 min FLS2 flg22	0.0627495	0.125499
			BRI1 mock	0.49 ± 0.09	3	0-10 min FLS2 flg22 - 20-30 min FLS2 flg22	0.0445516	0.0891031
		10-20 min	FLS2 flg22	0.68 ± 0.09	9	0-10 min BRI1 flg22 - 10-20 min BRI1 flg22	0.392389	0.784778
			FLS2 mock	0.64 ± 0.12	4	10-20 min BRI1 flg22 - 20-30 min BRI1 flg22	0.0457454	0.0914909
			BRI1 flg22	0.52 ± 0.11	9	0-10 min BRI1 flg22 - 20-30 min BRI1 flg22	0.117	0.234
			BRI1 mock	0.50 ± 0.15	5
		20-30 min	FLS2 flg22	0.69 ± 0.09	12	0-10 min FLS2 mock - 10-20 min FLS2 mock	0.405924	0.811849
			FLS2 mock	0.64 ± 0.19	6	10-20 min FLS2 mock - 20-30 min FLS2 mock	0.340771	0.681541
			BRI1 flg22	0.54 ± 0.07	12	0-10 min FLS2 mock - 20-30 min FLS2 mock	0.170013	0.340026
			BRI1 mock	0.57 ± 0.10	6	0-10 min BRI1 mock - 10-20 min BRI1 mock	0.245142	0.490285
	Exp3	0-10 min	FLS2 flg22	0.69 ± 0.05	9	10-20 min BRI1 mock - 20-30 min BRI1 mock	0.236558	0.473117
			FLS2 mock	0.56 ± 0.05	3	0-10 min BRI1 mock - 20-30 min BRI1 mock	0.445381	0.890762
			BRI1 flg22	0.50 ± 0.10	9
			BRI1 mock	0.44 ± 0.14	3
		10-20 min	FLS2 flg22	0.70 ± 0.11	9
			FLS2 mock	0.63 ± 0.05	3
			BRI1 flg22	0.56 ± 0.07	9
			BRI1 mock	0.49 ± 0.15	5
		20-30 min	FLS2 flg22	0.76 ± 0.06	11
			FLS2 mock	0.63 ± 0.12	7
			BRI1 flg22	0.54 ± 0.08	12
			BRI1 mock	0.51 ± 0.08	7
Figure 4B	Exp1	0-10 min	FLS2 flg22	0.56 ± 0.07	7	0-10 min FLS2 flg22 - FLS2 mock	0.209	0.418
			FLS2 mock	0.55 ± 0.06	3	0-10 min BRI1 flg22 - BRI1 mock	0.179	0.358
			BRI1 flg22	0.60 ± 0.02	6	0-10 min FLS2 flg22 - BRI1 flg22	0.0192396	0.0384792
			BRI1 mock	0.50 ± 0.10	3	0-10 min FLS2 mock - BRI1 mock	0.238654	0.477308
		10-20 min	FLS2 flg22	0.57 ± 0.04	9	10-20 min FLS2 flg22 - FLS2 mock	0.025	0.05
			FLS2 mock	0.53 ± 0.01	3	10-20 min BRI1 flg22 - BRI1 mock	0.062	0.124
			BRI1 flg22	0.59 ± 0.02	6	10-20 min FLS2 flg22 - BRI1 flg22	0.127171	0.254342
			BRI1 mock	0.53 ± 0.06	4	10-20 min FLS2 mock - BRI1 mock	0.266233	0.532466
		20-30 min	FLS2 flg22	0.54 ± 0.04	10	20-30 min FLS2 flg22 - FLS2 mock	0.315	0.63
			FLS2 mock	0.58 ± 0.04	5	20-30 min BRI1 flg22 - BRI1 mock	0.003	0.006
			BRI1 flg22	0.58 ± 0.05	8	20-30 min FLS2 flg22 - BRI1 flg22	0.0606111	0.121222
			BRI1 mock	0.62 ± 0.05	5	20-30 min FLS2 mock - BRI1 mock	0.0316842	0.0633684
	Exp2	0-10 min	FLS2 flg22	0.54 ± 0.07	9
			FLS2 mock	0.56 ± 0.06	4	0-10 min FLS2 flg22 - 10-20 min FLS2 flg22	0.327592	0.655185
			BRI1 flg22	0.64 ± 0.05	9	10-20 min FLS2 flg22 - 20-30 min FLS2 flg22	0.148346	0.296691
			BRI1 mock	0.59 ± 0.04	3	0-10 min FLS2 flg22 - 20-30 min FLS2 flg22	0.326481	0.652963
		10-20 min	FLS2 flg22	0.58 ± 0.04	9	0-10 min BRI1 flg22 - 10-20 min BRI1 flg22	0.139944	0.279889
			FLS2 mock	0.52 ± 0.03	4	10-20 min BRI1 flg22 - 20-30 min BRI1 flg22	0.216277	0.432553
			BRI1 flg22	0.62 ± 0.08	9	0-10 min BRI1 flg22 - 20-30 min BRI1 flg22	0.0407194	0.0814387
			BRI1 mock	0.53 ± 0.10	5
		20-30 min	FLS2 flg22	0.54 ± 0.03	12	0-10 min FLS2 mock - 10-20 min FLS2 mock	0.297284	0.594567
			FLS2 mock	0.50 ± 0.10	6	10-20 min FLS2 mock - 20-30 min FLS2 mock	0.408461	0.816922
			BRI1 flg22	0.57 ± 0.05	12	0-10 min FLS2 mock - 20-30 min FLS2 mock	0.447056	0.894112
			BRI1 mock	0.61 ± 0.04	6	0-10 min BRI1 mock - 10-20 min BRI1 mock	0.271846	0.543692
	Exp3	0-10 min	FLS2 flg22	0.59 ± 0.03	9	10-20 min BRI1 mock - 20-30 min BRI1 mock	0.0255276	0.0510551
			FLS2 mock	0.51 ± 0.03	3	0-10 min BRI1 mock - 20-30 min BRI1 mock	0.183644	0.367289
			BRI1 flg22	0.61 ± 0.06	9
			BRI1 mock	0.63 ± 0.05	3
		10-20 min	FLS2 flg22	0.55 ± 0.05	9
			FLS2 mock	0.55 ± 0.02	3
			BRI1 flg22	0.57 ± 0.04	9
			BRI1 mock	0.58 ± 0.11	5
		20-30 min	FLS2 flg22	0.57 ± 0.02	11
			FLS2 mock	0.53 ± 0.04	7
			BRI1 flg22	0.58 ± 0.07	12
			BRI1 mock	0.63 ± 0.06	7
Figure 4C	Exp1	0-10 min	FLS2 flg22	0.39 ± 0.15	7	0-10 min FLS2 flg22 - FLS2 mock	0.365	0.73
			FLS2 mock	0.44 ± 0.04	3	0-10 min BRI1 flg22 - BRI1 mock	0.34	0.68
			BRI1 flg22	0.38 ± 0.09	6	0-10 min FLS2 flg22 - BRI1 flg22	0.082795	0.16559
			BRI1 mock	0.36 ± 0.19	3	0-10 min FLS2 mock - BRI1 mock	0.227962	0.455925
		10-20 min	FLS2 flg22	0.34 ± 0.12	9	10-20 min FLS2 flg22 - FLS2 mock	0.18	0.36
			FLS2 mock	0.46 ± 0.11	3	10-20 min BRI1 flg22 - BRI1 mock	0.075	0.15
			BRI1 flg22	0.39 ± 0.08	6	10-20 min FLS2 flg22 - BRI1 flg22	0.0204001	0.0408001
			BRI1 mock	0.41 ± 0.11	4	10-20 min FLS2 mock - BRI1 mock	0.199644	0.399288
		20-30 min	FLS2 flg22	0.23 ± 0.13	10	20-30 min FLS2 flg22 - FLS2 mock	0.01	0.02
			FLS2 mock	0.34 ± 0.09	5	20-30 min BRI1 flg22 - BRI1 mock	0.094	0.188
			BRI1 flg22	0.35 ± 0.11	8	20-30 min FLS2 flg22 - BRI1 flg22	0.00163937	0.00327873
			BRI1 mock	0.45 ± 0.04	5	20-30 min FLS2 mock - BRI1 mock	0.0119987	0.0239975
	Exp2	0-10 min	FLS2 flg22	0.38 ± 0.08	9
			FLS2 mock	0.30 ± 0.10	4	0-10 min FLS2 flg22 - 10-20 min FLS2 flg22	0.154089	0.308177
			BRI1 flg22	0.47 ± 0.08	9	10-20 min FLS2 flg22 - 20-30 min FLS2 flg22	0.0599845	0.119969
			BRI1 mock	0.43 ± 0.07	3	0-10 min FLS2 flg22 - 20-30 min FLS2 flg22	0.0396221	0.0792443
		10-20 min	FLS2 flg22	0.28 ± 0.07	9	0-10 min BRI1 flg22 - 10-20 min BRI1 flg22	0.171641	0.343281
			FLS2 mock	0.30 ± 0.10	4	10-20 min BRI1 flg22 - 20-30 min BRI1 flg22	0.125482	0.250964
			BRI1 flg22	0.41 ± 0.09	9	0-10 min BRI1 flg22 - 20-30 min BRI1 flg22	0.0820031	0.164006
			BRI1 mock	0.41 ± 0.08	5
		20-30 min	FLS2 flg22	0.26 ± 0.08	12	0-10 min FLS2 mock - 10-20 min FLS2 mock	0.437167	0.874335
			FLS2 mock	0.29 ± 0.12	6	10-20 min FLS2 mock - 20-30 min FLS2 mock	0.26245	0.5249
			BRI1 flg22	0.39 ± 0.05	12	0-10 min FLS2 mock - 20-30 min FLS2 mock	0.171322	0.342645
			BRI1 mock	0.37 ± 0.07	6	0-10 min BRI1 mock - 10-20 min BRI1 mock	0.469961	0.939923
	Exp3	0-10 min	FLS2 flg22	0.27 ± 0.04	9	10-20 min BRI1 mock - 20-30 min BRI1 mock	0.46089	0.92178
			FLS2 mock	0.37 ± 0.04	3	0-10 min BRI1 mock - 20-30 min BRI1 mock	0.449659	0.899319
			BRI1 flg22	0.44 ± 0.07	9
			BRI1 mock	0.45 ± 0.09	3
		10-20 min	FLS2 flg22	0.26 ± 0.08	9
			FLS2 mock	0.32 ± 0.04	3
			BRI1 flg22	0.38 ± 0.06	9
			BRI1 mock	0.41 ± 0.10	5
		20-30 min	FLS2 flg22	0.21 ± 0.05	11
			FLS2 mock	0.32 ± 0.09	7
			BRI1 flg22	0.38 ± 0.06	12
			BRI1 mock	0.42 ± 0.06	7
Figure 4D	Exp1	0-10 min	FLS2 flg22	0.40 ± 0.05	7	0-10 min FLS2 flg22 - FLS2 mock	0.263	0.526
			FLS2 mock	0.41 ± 0.05	3	0-10 min BRI1 flg22 - BRI1 mock	0.126	0.252
			BRI1 flg22	0.38 ± 0.03	6	0-10 min FLS2 flg22 - BRI1 flg22	0.0447863	0.0895726
			BRI1 mock	0.43 ± 0.06	3	0-10 min FLS2 mock - BRI1 mock	0.296798	0.593596
		10-20 min	FLS2 flg22	0.38 ± 0.03	9	10-20 min FLS2 flg22 - FLS2 mock	0.029	0.058
			FLS2 mock	0.43 ± 0.01	3	10-20 min BRI1 flg22 - BRI1 mock	0.084	0.168
			BRI1 flg22	0.40 ± 0.01	6	10-20 min FLS2 flg22 - BRI1 flg22	0.347324	0.694648
			BRI1 mock	0.43 ± 0.04	4	10-20 min FLS2 mock - BRI1 mock	0.371991	0.743983
		20-30 min	FLS2 flg22	0.41 ± 0.03	10	20-30 min FLS2 flg22 - FLS2 mock	0.29	0.58
			FLS2 mock	0.39 ± 0.03	5	20-30 min BRI1 flg22 - BRI1 mock	0.01	0.02
			BRI1 flg22	0.39 ± 0.03	8	20-30 min FLS2 flg22 - BRI1 flg22	0.20754	0.415079
			BRI1 mock	0.36 ± 0.03	5	20-30 min FLS2 mock - BRI1 mock	0.0347195	0.0694391
	Exp2	0-10 min	FLS2 flg22	0.42 ± 0.05	9
			FLS2 mock	0.40 ± 0.04	4	0-10 min FLS2 flg22 - 10-20 min FLS2 flg22	0.36952	0.739041
			BRI1 flg22	0.35 ± 0.04	9	10-20 min FLS2 flg22 - 20-30 min FLS2 flg22	0.236244	0.472489
			BRI1 mock	0.40 ± 0.04	3	0-10 min FLS2 flg22 - 20-30 min FLS2 flg22	0.388422	0.776843
		10-20 min	FLS2 flg22	0.40 ± 0.03	9	0-10 min BRI1 flg22 - 10-20 min BRI1 flg22	0.142097	0.284194
			FLS2 mock	0.44 ± 0.02	4	10-20 min BRI1 flg22 - 20-30 min BRI1 flg22	0.316484	0.632968
			BRI1 flg22	0.37 ± 0.07	9	0-10 min BRI1 flg22 - 20-30 min BRI1 flg22	0.0413881	0.0827761
			BRI1 mock	0.44 ± 0.06	5
		20-30 min	FLS2 flg22	0.42 ± 0.02	12	0-10 min FLS2 mock - 10-20 min FLS2 mock	0.223446	0.446892
			FLS2 mock	0.43 ± 0.05	6	10-20 min FLS2 mock - 20-30 min FLS2 mock	0.287659	0.575318
			BRI1 flg22	0.41 ± 0.04	12	0-10 min FLS2 mock - 20-30 min FLS2 mock	0.449933	0.899866
			BRI1 mock	0.38 ± 0.03	6	0-10 min BRI1 mock - 10-20 min BRI1 mock	0.209919	0.419839
	Exp3	0-10 min	FLS2 flg22	0.39 ± 0.03	9	10-20 min BRI1 mock - 20-30 min BRI1 mock	0.0189076	0.0378152
			FLS2 mock	0.44 ± 0.01	3	0-10 min BRI1 mock - 20-30 min BRI1 mock	0.130507	0.261014
			BRI1 flg22	0.38 ± 0.05	9
			BRI1 mock	0.37 ± 0.05	3
		10-20 min	FLS2 flg22	0.41 ± 0.03	9
			FLS2 mock	0.41 ± 0.01	3
			BRI1 flg22	0.41 ± 0.03	9
			BRI1 mock	0.40 ± 0.09	5
		20-30 min	FLS2 flg22	0.39 ± 0.02	11
			FLS2 mock	0.43 ± 0.03	7
			BRI1 flg22	0.40 ± 0.05	12
			BRI1 mock	0.37 ± 0.05	7
Figure 4E	Exp1	0-10 min	FLS2 flg22	0.08 ± 0.04	7	0-10 min FLS2 flg22 - FLS2 mock	0.356	0.712
			FLS2 mock	0.08 ± 0.01	3	0-10 min BRI1 flg22 - BRI1 mock	0.038	0.076
			BRI1 flg22	0.05 ± 0.03	6	0-10 min FLS2 flg22 - BRI1 flg22	0.472032	0.944064
			BRI1 mock	0.09 ± 0.06	3	0-10 min FLS2 mock - BRI1 mock	0.0939424	0.187885
		10-20 min	FLS2 flg22	0.06 ± 0.03	9	10-20 min FLS2 flg22 - FLS2 mock	0.151	0.302
			FLS2 mock	0.11 ± 0.05	3	10-20 min BRI1 flg22 - BRI1 mock	0.027	0.054
			BRI1 flg22	0.07 ± 0.03	6	10-20 min FLS2 flg22 - BRI1 flg22	0.0201873	0.0403747
			BRI1 mock	0.08 ± 0.01	4	10-20 min FLS2 mock - BRI1 mock	0.266302	0.532603
		20-30 min	FLS2 flg22	0.03 ± 0.03	10	20-30 min FLS2 flg22 - FLS2 mock	0.029	0.058
			FLS2 mock	0.05 ± 0.02	5	20-30 min BRI1 flg22 - BRI1 mock	0.35	0.7
			BRI1 flg22	0.06 ± 0.03	8	20-30 min FLS2 flg22 - BRI1 flg22	0.00641322	0.0128264
			BRI1 mock	0.07 ± 0.02	5	20-30 min FLS2 mock - BRI1 mock	0.199471	0.398943
	Exp2	0-10 min	FLS2 flg22	0.07 ± 0.03	9
			FLS2 mock	0.05 ± 0.03	4	0-10 min FLS2 flg22 - 10-20 min FLS2 flg22	0.148604	0.297207
			BRI1 flg22	0.07 ± 0.03	9	10-20 min FLS2 flg22 - 20-30 min FLS2 flg22	0.100671	0.201341
			BRI1 mock	0.08 ± 0.02	3	0-10 min FLS2 flg22 - 20-30 min FLS2 flg22	0.0638964	0.127793
		10-20 min	FLS2 flg22	0.04 ± 0.02	9	0-10 min BRI1 flg22 - 10-20 min BRI1 flg22	0.178513	0.357026
			FLS2 mock	0.06 ± 0.03	4	10-20 min BRI1 flg22 - 20-30 min BRI1 flg22	0.424258	0.848515
			BRI1 flg22	0.07 ± 0.03	9	0-10 min BRI1 flg22 - 20-30 min BRI1 flg22	0.263092	0.526183
			BRI1 mock	0.09 ± 0.06	5
		20-30 min	FLS2 flg22	0.04 ± 0.02	12	0-10 min FLS2 mock - 10-20 min FLS2 mock	0.429065	0.858131
			FLS2 mock	0.07 ± 0.07	6	10-20 min FLS2 mock - 20-30 min FLS2 mock	0.250604	0.501208
			BRI1 flg22	0.07 ± 0.03	12	0-10 min FLS2 mock - 20-30 min FLS2 mock	0.185781	0.371561
			BRI1 mock	0.06 ± 0.03	6	0-10 min BRI1 mock - 10-20 min BRI1 mock	0.419546	0.839092
	Exp3	0-10 min	FLS2 flg22	0.04 ± 0.01	9	10-20 min BRI1 mock - 20-30 min BRI1 mock	0.0153097	0.0306194
			FLS2 mock	0.07 ± 0.02	3	0-10 min BRI1 mock - 20-30 min BRI1 mock	0.0479447	0.0958895
			BRI1 flg22	0.07 ± 0.03	9
			BRI1 mock	0.11 ± 0.05	3
		10-20 min	FLS2 flg22	0.04 ± 0.03	9
			FLS2 mock	0.05 ± 0.01	3
			BRI1 flg22	0.06 ± 0.02	9
			BRI1 mock	0.10 ± 0.05	5
		20-30 min	FLS2 flg22	0.02 ± 0.01	11
			FLS2 mock	0.05 ± 0.03	7
			BRI1 flg22	0.08 ± 0.02	12
			BRI1 mock	0.07 ± 0.02	7
Figure 4F	Exp1	0-10 min	FLS2 flg22	0.05 ± 0.03	7	0-10 min FLS2 flg22 - FLS2 mock	0.202	0.404
			FLS2 mock	0.04 ± 0.01	3	0-10 min BRI1 flg22 - BRI1 mock	0.285	0.57
			BRI1 flg22	0.02 ± 0.01	6	0-10 min FLS2 flg22 - BRI1 flg22	0.0156109	0.0312219
			BRI1 mock	0.06 ± 0.04	3	0-10 min FLS2 mock - BRI1 mock	0.208107	0.416214
		10-20 min	FLS2 flg22	0.04 ± 0.02	9	10-20 min FLS2 flg22 - FLS2 mock	0.192	0.384
			FLS2 mock	0.04 ± 0.01	3	10-20 min BRI1 flg22 - BRI1 mock	0.052	0.104
			BRI1 flg22	0.01 ± 0.01	6	10-20 min FLS2 flg22 - BRI1 flg22	0.0222196	0.0444393
			BRI1 mock	0.04 ± 0.02	4	10-20 min FLS2 mock - BRI1 mock	0.11995	0.239899
		20-30 min	FLS2 flg22	0.05 ± 0.02	10	20-30 min FLS2 flg22 - FLS2 mock	0.22	0.44
			FLS2 mock	0.03 ± 0.01	5	20-30 min BRI1 flg22 - BRI1 mock	0.044	0.088
			BRI1 flg22	0.02 ± 0.01	8	20-30 min FLS2 flg22 - BRI1 flg22	0.0490327	0.0980654
			BRI1 mock	0.02 ± 0.02	5	20-30 min FLS2 mock - BRI1 mock	0.00567349	0.011347
	Exp2	0-10 min	FLS2 flg22	0.04 ± 0.03	9
			FLS2 mock	0.04 ± 0.02	4	0-10 min FLS2 flg22 - 10-20 min FLS2 flg22	0.394416	0.788832
			BRI1 flg22	0.01 ± 0.00	9	10-20 min FLS2 flg22 - 20-30 min FLS2 flg22	0.225328	0.450656
			BRI1 mock	0.01 ± 0.00	3	0-10 min FLS2 flg22 - 20-30 min FLS2 flg22	0.315603	0.631206
		10-20 min	FLS2 flg22	0.03 ± 0.02	9	0-10 min BRI1 flg22 - 10-20 min BRI1 flg22	0.248942	0.497884
			FLS2 mock	0.04 ± 0.01	4	10-20 min BRI1 flg22 - 20-30 min BRI1 flg22	0.0226395	0.0452791
			BRI1 flg22	0.01 ± 0.01	9	0-10 min BRI1 flg22 - 20-30 min BRI1 flg22	0.0708152	0.14163
			BRI1 mock	0.04 ± 0.04	5
		20-30 min	FLS2 flg22	0.04 ± 0.01	12	0-10 min FLS2 mock - 10-20 min FLS2 mock	0.185316	0.370631
			FLS2 mock	0.06 ± 0.05	6	10-20 min FLS2 mock - 20-30 min FLS2 mock	0.0794032	0.158806
			BRI1 flg22	0.02 ± 0.02	12	0-10 min FLS2 mock - 20-30 min FLS2 mock	0.0249913	0.0499826
			BRI1 mock	0.01 ± 0.00	6	0-10 min BRI1 mock - 10-20 min BRI1 mock	0.37919	0.758381
	Exp3	0-10 min	FLS2 flg22	0.03 ± 0.01	9	10-20 min BRI1 mock - 20-30 min BRI1 mock	0.0288229	0.0576459
			FLS2 mock	0.05 ± 0.01	3	0-10 min BRI1 mock - 20-30 min BRI1 mock	0.289746	0.579491
			BRI1 flg22	0.01 ± 0.01	9
			BRI1 mock	0.00 ± 0.00	3
		10-20 min	FLS2 flg22	0.04 ± 0.02	9
			FLS2 mock	0.04 ± 0.01	3
			BRI1 flg22	0.02 ± 0.01	9
			BRI1 mock	0.02 ± 0.02	5
		20-30 min	FLS2 flg22	0.03 ± 0.01	11
			FLS2 mock	0.04 ± 0.01	7
			BRI1 flg22	0.02 ± 0.01	12
			BRI1 mock	0.01 ± 0.01	7
Figure 5I & Figure 5 - figure supplement 1	Exp1		FLS2-FLS2 (original)	0.69 ± 0.15	16	FLS2-FLS2 (original) - BRI1-FLS2 (original)	0.002	0.004
			FLS2-FLS2 (rotated)	0.01 ± 0.06	16	FLS2-FLS2 (original) - FLS2-FLS2 (rotated)	0.00102	0.00204
			BRI1-FLS2 (original)	0.09 ± 0.06	18	BRI1-FLS2 (original) - BRI1-FLS2 (rotated)	0.083	0.168
			BRI1-FLS2 (rotated)	-0.01 ± 0.05	18
	Exp2		FLS2-FLS2 (original)	0.27 ± 0.09	10
			FLS2-FLS2 (rotated)	-0.03 ± 0.04	10
			BRI1-FLS2 (original)	-0.01 ± 0.04	11
			BRI1-FLS2 (rotated)	-0.03 ± 0.04	11
	Exp3		FLS2-FLS2 (original)	0.28 ± 0.10	8
			FLS2-FLS2 (rotated)	-0.05 ± 0.03	8
			BRI1-FLS2 (original)	0.05 ± 0.05	8
			BRI1-FLS2 (rotated)	-0.02 ± 0.03	8
	Exp4		FLS2-FLS2 (original)	0.26 ± 0.03	5
			FLS2-FLS2 (rotated)	-0.04 ± 0.03	5
			BRI1-FLS2 (original)	0.02 ± 0.04	7
			BRI1-FLS2 (rotated)	-0.03 ± 0.02	7
	Exp5		FLS2-FLS2 (original)	0.32 ± 0.08	17
			FLS2-FLS2 (rotated)	0.00 ± 0.05	17
			BRI1-FLS2 (original)	-0.01 ± 0.03	18
			BRI1-FLS2 (rotated)	0.02 ± 0.04	18
	Exp6		FLS2-FLS2 (original)	0.48 ± 0.09	20
			FLS2-FLS2 (rotated)	0.02 ± 0.05	20
			BRI1-FLS2 (original)	0.18 ± 0.06	22
			BRI1-FLS2 (rotated)	0.01 ± 0.05	22
	Exp1		FLS2-BRI1 (original)	0.08 ± 0.02	14
			FLS2-BRI1 (rotated)	0.01 ± 0.04	14
			BRI1-BRI1 (original)	0.29 ± 0.06	20
			BRI1-BRI1 (rotated)	-0.00 ± 0.05	20
Figure 5J & Figure 5 - figure supplement 1	Exp1		FLS2-FLS2 BRZ (ori)	0.37 ± 0.09	21	FLS2-FLS2 BRZ (ori.) - FLS2-BRI1 BRZ (ori.)	0.008	0.016
			FLS2-FLS2 BRZ (rot.)	0.01 ± 0.04	21	BRI1-BRI1 BRZ (ori.) - BRI1-FLS2 BRZ (ori.)	0.003	0.006
			FLS2-FLS2 mock (ori.)	0.33 ± 0.05	15	FLS2-FLS2 mock (ori.) - FLS2-BRI1 mock (ori.)	0.004	0.008
			FLS2-FLS2 mock (rot.)	0.02 ± 0.03	15	BRI1-BRI1 mock (ori.) - BRI1-FLS2 mock (ori.)	0.021	0.042
			FLS2-BRI1 BRZ (ori)	0.06 ± 0.05	17
			FLS2-BRI1 BRZ (rot.)	0.04 ± 0.06	17	FLS2-FLS2 BRZ (ori.) - FLS2-FLS2 mock (ori.)	0.451	0.902
			FLS2-BRI1 mock (ori.)	0.03 ± 0.05	16	BRI1-BRI1 BRZ (ori.) - BRI1-BRI1 mock (ori.)	0.157	0.314
			FLS2-BRI1 mock (rot.)	0.01 ± 0.04	16
			BRI1-FLS2 BRZ (ori.)	0.04 ± 0.04	14	FLS2-BRI1 BRZ (ori.) - FLS2-BRI1 mock (ori.)	0.877	> 1
			BRI1-FLS2 BRZ (rot.)	0.00 ± 0.05	14	BRI1-FLS2 BRZ (ori.) - BRI1-FLS2 mock (ori.)	0.207	0.414
			BRI1-FLS2 mock (ori.)	0.07 ± 0.03	15
			BRI1-FLS2 mock (rot.)	0.02 ± 0.03	15	FLS2-FLS2 BRZ (ori.) - FLS2-FLS2 BRZ (rot.)	0.017	0.034
			BRI1-BRI1 BRZ (ori.)	0.27 ± 0.07	17	FLS2-FLS2 mock (ori.) - FLS2-FLS2 mock (rot.)	0.000486	0.000972
			BRI1-BRI1 BRZ (rot.)	0.00 ± 0.05	17	FLS2-BRI1 BRZ (ori.) - FLS2-BRI1 BRZ (rot.)	0.646	> 1
			BRI1-BRI1 mock (ori.)	0.20 ± 0.07	14	FLS2-BRI1 mock (ori.) - FLS2-BRI1 mock (rot.)	0.083	0.166
			BRI1-BRI1 mock (rot.)	0.02 ± 0.02	14	BRI1-BRI1 BRZ (ori.) - BRI1-BRI1 BRZ (rot.)	0.019	0.038
	Exp2		FLS2-FLS2 BRZ (ori)	0.34 ± 0.09	15	BRI1-BRI1 mock (ori.) - BRI1-BRI1 mock (rot.)	0.004	0.008
			FLS2-FLS2 BRZ (rot.)	0.00 ± 0.04	15	BRI1-FLS2 BRZ (ori.) - BRI1-FLS2 BRZ (rot.)	0.086	0.172
			FLS2-FLS2 mock (ori.)	0.34 ± 0.09	13	BRI1-FLS2 mock (ori.) - BRI1-FLS2 mock (rot.)	0.012	0.024
			FLS2-FLS2 mock (rot.)	0.03 ± 0.03	13
			FLS2-BRI1 BRZ (ori)	0.02 ± 0.03	16
			FLS2-BRI1 BRZ (rot.)	0.01 ± 0.04	16
			FLS2-BRI1 mock (ori.)	0.03 ± 0.04	16
			FLS2-BRI1 mock (rot.)	0.01 ± 0.04	16
			BRI1-FLS2 BRZ (ori.)	0.06 ± 0.03	23
			BRI1-FLS2 BRZ (rot.)	-0.01 ± 0.04	23
			BRI1-FLS2 mock (ori.)	0.07 ± 0.03	14
			BRI1-FLS2 mock (rot.)	0.03 ± 0.06	14
			BRI1-BRI1 BRZ (ori.)	0.29 ± 0.12	15
			BRI1-BRI1 BRZ (rot.)	0.00 ± 0.04	15
			BRI1-BRI1 mock (ori.)	0.32 ± 0.06	17
			BRI1-BRI1 mock (rot.)	0.01 ± 0.05	17
Figure 7I & Figure 7 - figure supplement 1	Exp1		FLS2-REM1.2 (original)	0.14 ± 0.06	24	FLS2-REM1.2 (original) - BRI1-REM1.2 (original)	0.000857	0.00171
			FLS2-REM1.2 (rotated)	0.02 ± 0.05	24	FLS2-REM1.2 (original) - FLS2-REM1.2 (rotated)	7.96969e-05	0.000159394
			BRI1-REM1.2 (original)	0.01 ± 0.06	16	BRI1-REM1.2 (original) - BRI1-REM1.2 (rotated)	0.0886817	0.177363
			BRI1-REM1.2 (rotated)	0.02 ± 0.05	16	FLS2-REM1.3 (original) - BRI1-REM1.3 (original)	0.0136949	0.0273898
			FLS2-REM1.3 (original)	0.17 ± 0.05	18	FLS2-REM1.3 (original) - FLS2-REM1.3 (rotated)	7.39049e-05	0.00014781
			FLS2-REM1.3 (rotated)	0.00 ± 0.05	18	BRI1-REM1.3 (original) - BRI1-REM1.3 (rotated)	0.965326	> 1
			BRI1-REM1.3 (original)	0.03 ± 010	19	FLS2-REM6.1 (original) - BRI1-REM6.1 (original)	0.177037	0.354074
			BRI1-REM1.3 (rotated)	0.00 ± 0.05	19	FLS2-REM6.1 (original) - FLS2-REM6.1 (rotated)	0.00773857	0.0154771
			FLS2-REM6.1 (original)	0.38 ± 0.12	16	BRI1-REM6.1 (original) - BRI1-REM6.1 (rotated)	0.011463	0.022926
			FLS2-REM6.1 (rotated)	0.04 ± 0.05	16	FLS2-REM6.2 (original) - BRI1-REM6.2 (original)	0.0103235	0.020647
			BRI1-REM6.1 (original)	0.27 ± 0.04	13	FLS2-REM6.2 (original) - FLS2-REM6.2 (rotated)	0.0055308	0.0110616
			BRI1-REM6.1 (rotated)	0.03 ± 0.04	13	BRI1-REM6.2 (original) - BRI1-REM6.2 (rotated)	0.000612383	0.00122477
			FLS2-REM6.2 (original)	0.09 ± 0.05	21
			FLS2-REM6.2 (rotated)	-0.04 ± 0.05	21
			BRI1-REM6.2 (original)	0.29 ± 0.07	19
			BRI1-REM6.2 (rotated)	0.00 ± 0.06	19
	Exp2		FLS2-REM1.2 (original)	0.15 ± 0.11	16
			FLS2-REM1.2 (rotated)	0.02 ± 0.04	16
			BRI1-REM1.2 (original)	-0.04 ± 0.07	21
			BRI1-REM1.2 (rotated)	0.03 ± 0.05	21
			FLS2-REM1.3 (original)	0.19 ± 0.06	20
			FLS2-REM1.3 (rotated)	0.00 ± 0.04	20
			BRI1-REM1.3 (original)	0.02 ± 0.06	22
			BRI1-REM1.3 (rotated)	0.02 ± 0.05	22
			FLS2-REM6.1 (original)	0.40 ± 0.11	19
			FLS2-REM6.1 (rotated)	0.03 ± 0.04	19
			BRI1-REM6.1 (original)	0.22 ± 0.07	16
			BRI1-REM6.1 (rotated)	0.02 ± 0.04	16
			FLS2-REM6.2 (original)	0.08 ± 0.05	23
			FLS2-REM6.2 (rotated)	0.01 ± 0.05	23
			BRI1-REM6.2 (original)	0.21 ± 0.06	28
			BRI1-REM6.2 (rotated)	0.02 ± 0.06	28
	Exp3		FLS2-REM1.2 (original)	0.17 ± 0.09	18
			FLS2-REM1.2 (rotated)	0.00 ± 0.04	18
			BRI1-REM1.2 (original)	-0.02 ± 0.07	19
			BRI1-REM1.2 (rotated)	0.00 ± 0.04	19
			FLS2-REM1.3 (original)	0.16 ± 0.06	16
			FLS2-REM1.3 (rotated)	0.01 ± 0.05	16
			BRI1-REM1.3 (original)	-0.05 ± 0.12	9
			BRI1-REM1.3 (rotated)	-0.03 ± 0.09	9
			FLS2-REM6.1 (original)	0.21 ± 0.07	12
			FLS2-REM6.1 (rotated)	-0.01 ± 0.05	12
			BRI1-REM6.1 (original)	0.12 ± 0.08	13
			BRI1-REM6.1 (rotated)	-0.02 ± 0.04	13
			FLS2-REM6.2 (original)	0.12 ± -.07	15
			FLS2-REM6.2 (rotated)	0.00 ± 0.05	15
			BRI1-REM6.2 (original)	0.23 ± 0.09	14
			BRI1-REM6.2 (rotated)	0.02 ± 0.05	14
Figure 8I	Exp1		FLS2/BSK1-BSK1	0.23 ± 0.04	34	FLS2/BSK1-BSK1 - BRI1/BSK1-BSK1	0.701056	> 1
			BRI1/BSK1-BSK1	0.32 ± 0.07	12	FLS2/BSK1-FLS2 - BRI1/BSK1-BRI1	0.960903	> 1
			FLS2/BSK1-FLS2	0.30 ± 0.08	34	FLS2-BSK1 - BRI1-BSK1	0.889832	> 1
			BRI1/BSK1-BRI1	0.38 ± 0.09	12
			FLS2-BSK1	0.22 ± 0.06	34
			BRI1-BSK1	0.31 ± 0.07	12
	Exp2		FLS2/BSK1-BSK1	0.19 ± 0.06	24
			BRI1/BSK1-BSK1	0.18 ± 0.04	14
			FLS2/BSK1-FLS2	0.24 ± 0.06	24
			BRI1/BSK1-BRI1	0.20 ± 0.03	14
			FLS2-BSK1	0.21 ± 0.06	24
			BRI1-BSK1	0.16 ± 0.06	14
	Exp3		FLS2/BSK1-BSK1	0.21 ± 0.07	22
			BRI1/BSK1-BSK1	0.19 ± 0.04	26
			FLS2/BSK1-FLS2	0.29 ± 0.10	22
			BRI1/BSK1-BRI1	0.26 ± 0.06	26
			FLS2-BSK1	0.24 ± 0.07	22
			BRI1-BSK1	0.22 ± 0.05	26
Figure 9O	Exp1		FLS2/BIK1-BIK1	0.16 ± 0.05	24	FLS2/BIK1-BIK1 - BRI1/BIK1-BIK1	0.81299	> 1
			BRI1/BIK1-BIK1	0.17 ± 0.05	41	FLS2/BIK1-FLS2 - BRI1/BIK1-BRI1	0.429336	0.858673
			FLS2/BIK1-FLS2	0.31 ± 0.09	24	FLS2-BIK1 - BRI1-BIK1	0.564129	> 1
			BRI1/BIK1-BRI1	0.20 ± 0.06	41
			FLS2-BIK1	0.13 ± 0.06	24
			BRI1-BIK1	0.18 ± 0.05	41
	Exp2		FLS2/BIK1-BIK1	0.06 ± 0.04	15
			BRI1/BIK1-BIK1	0.11 ± 0.05	12
			FLS2/BIK1-FLS2	0.13 ± 0.05	15
			BRI1/BIK1-BRI1	0.21 ± 0.07	12
			FLS2-BIK1	0.06 ± 0.03	15
			BRI1-BIK1	0.10 ± 0.05	12
	Exp3		FLS2/BIK1-BIK1	0.11 ± 0.06	23
			BRI1/BIK1-BIK1	0.08 ± 0.05	25
			FLS2/BIK1-FLS2	0.27 ± 0.08	23
			BRI1/BIK1-BRI1	0.13 ± 0.07	25
			FLS2-BIK1	0.11 ± 0.06	23
			BRI1-BIK1	0.09 ± 0.05	25
